# Supplementary material for: Nitrogen mineralization, not N 2 fixation alleviates progressive nitrogen limitation – Comment on ''Processes regulating progressive nitrogenlimitation under elevated carbon dioxide: a meta-analysis'' by Liang et al.
Source: Copernicus journal article supplement (doi:10.5194/bg-2016-456), 2016-10-28
Supplement: Supplementary file [file bg-2016-456-AC1-supplement.pdf]

## **Response to reviewer comments:**

I would like to thank both reviewers for the valuable inputs. Regarding the calculation exercise made on data from the Höglwald, as both reviewers were critical to this, I will omit this part from the paper. This exercise was merely intended as an illustration and omitting this will not alter the conclusion from my comment. Instead, I will add a paragraph on illustrating quantitatively the likely amount of additional N made available by different processes, N<sub>2</sub> fixation, N mineralization and N leaching. Based on literature on annual fluxes of these processes, it is possible to quantify additional N supply under elevated CO<sub>2</sub>. Annual N<sub>2</sub> fixation rate in natural ecosystems, not dominated by symbiotic N<sub>2</sub> fixing plants, are in the range 1.5 – 25 kg N ha<sup>-1</sup> yr<sup>-1</sup> (Cleveland et al., 1999). Assuming an increase by 14 % under elevated CO<sub>2</sub> (as calculated for non-N<sub>2</sub> fixing plant communities), an additional amount of 0.2 – 3.5 kg N ha<sup>-1</sup> yr<sup>-1</sup> is provided. Annual leaching losses from temperate watershed are on average 0.3 kg N ha<sup>-1</sup> yr<sup>-1</sup> (Brookshire et al., 2012), which might decrease 42 % or 0.1 kg N ha<sup>-1</sup> yr<sup>-1</sup> under elevated CO<sub>2</sub>. That means that the two processes identified by Liang et al. combined lead to an increase in N availability of 0.3 – 3.6 kg N ha<sup>-1</sup> yr<sup>-1</sup>. If we consider an annual gross N mineralization in the range of 120 and 1000 kg N ha<sup>-1</sup> yr<sup>-1</sup> (Rosenkranz et al., 2010; Jamieson et al., 1999), an increase by 14 % under elevated CO<sub>2</sub> (Rütting and Andresen, 2015) provides an additional amount of plant available N of 17 to 140 kg N ha<sup>-1</sup> yr<sup>-1</sup>. This agrees well with the comment by David Wårlind, that a small change in a large flux can be more important than a large change in a small flux, to which I agree.

In regards to the comment by Feike Dijkstra if the reduction in leaching is similar in N limited ecosystems compared to non-N limited one: when calculating the weighted average, in accordance with Liang et al., N leaching was reduced in N limited by 21 %, compared to 42 % in the total data set. This means that the importance of reduced N leaching for alleviating a progressive N limitation (PNL) is even lower. However, it should first be noted that only four data points in the database by Liang et al. concerned N limited ecosystems. This limits the informative value of the N leaching response in N limited ecosystems. Nevertheless, this information can be added to the paper.

David Wårlind pointed out that changes in the N use efficiency (NUE) could also prevent the development of a PNL. In grassland species, an increase in NUE has indeed been observed (Lee et al., 2011). However, among four forest FACE experiment, only in a poplar plantation NUE was increased under elevated CO<sub>2</sub>, while NUE was unchanged in the remaining three experiments (Finzi et al., 2007). Therefore, it is unclear if this mechanism is widespread in alleviating PNL. Nevertheless, I will mention this as an alternative process in the paper.

## **References**

- Brookshire, E. N. J., Gerber, S., Menge, D. N. L., and Hedin, L. O.: Large losses of inorganic nitrogen from tropical rainforests suggest a lack of nitrogen limitation, *Ecology Letters*, 15, 9-16, 2012.
- Cleveland, C. C., Townsend, A. R., Schimel, D. S., Fisher, H., Howarth, R. W., Hedin, L. O., Perakis, S. S., Latty, E. F., von Fischer, J. C., Elserod, A., and Wasson, M. F.: Global

- patterns of terrestrial biological nitrogen (N<sub>2</sub>) fixation in natural ecosystems, *Global Biogeochemical Cycles*, 13, 623-645, 1999.
- Finzi, A. C., Norby, R. J., Calfapietra, C., Gallet-Budynek, A., Gielen, B., Holmes, W. E., Hoosbeek, M. R., Iversen, C. M., Jackson, R. B., Kubiske, M. E., Ledford, J., Liberloo, M., Oren, R., Polle, A., Pritchard, S., Zak, D. R., Schlesinger, W. H., and Ceulemans, R.: Increases in nitrogen uptake rather than nitrogen-use efficiency support higher rates of temperate forest productivity under elevated CO<sub>2</sub>, *PNAS*, 104, 14014-14019, 2007.
- Jamieson, N., Monaghan, R., and Barraclough, D.: Seasonal trends of gross N mineralization in natural calcareous grassland, *Global Change Biology*, 5, 423-431, 1999.
- Lee, T. D., Barrott, S. H., and Reich, P. B.: Photosynthetic responses of 13 grassland species across 11 years of free-air CO<sub>2</sub> enrichment is modest, consistent and independent of N supply, *Global Change Biology*, 17, 2893-2904, 2011.
- Rosenkranz, P., Dannenmann, M., Brüggemann, N., Papen, H., Berger, U., Zumbusch, E., and Butterbach-Bahl, K.: Gross rates of ammonification and nitrification at a nitrogen-saturated spruce (*Picea abies* (L.) Karst.) stand in southern Germany, *European Journal of Soil Science*, 61, 745-758, 2010.
- Rütting, T., and Andresen, L. C.: Nitrogen cycle responses to elevated CO<sub>2</sub> depend on ecosystem nutrient status, *Nutrient Cycling in Agroecosystems*, 101, 285-294, 2015.
